# Supplementary material
Source: HighWire-hosted journal article supplement (https://www.jpn.ca/highwire/filestream/89705/field_highwire_adjunct_files/0/jpn-140106-1-at.pdf)
Supplement: jpn-140106-1-at.pdf [file jpn-140106-1-at.pdf]

**Appendix 1** to Chiang H-Y, Chen Y-J, Lo Y-C, et al. Altered white matter tract property related to impaired focused attention, sustained attention, cognitive impulsivity and vigilance in attention-deficit hyperactivity disorder

*J Psychiatry Neurosci* 2015.

DOI: 10.1503/jpn.140106

Copyright © 2015 The Author(s) or their employer(s). To receive this resource in an accessible format, please contact us at [cmajgroup@cmaj.ca](mailto:cmajgroup@cmaj.ca).

**Table S1: Comparison of the generalized fractional anisotropy values of 10 fibre tracts between youths with ADHD and healthy controls for whom a 32-channel phased array head coil was used**

| Target tracts   | Group, mean ± SD    |                        | <i>t</i> | <i>p</i> value | Cohen <i>d</i> |
|-----------------|---------------------|------------------------|----------|----------------|----------------|
|                 | ADHD, <i>n</i> = 47 | Control, <i>n</i> = 47 |          |                |                |
| L caudate–VLPFC | 0.236 ± 0.017       | 0.242 ± 0.015          | -2.21    | 0.032          | -0.374         |
| R caudate–VLPFC | 0.234 ± 0.019       | 0.238 ± 0.017          | -1.21    | 0.23           | -0.222         |
| L caudate–DLPFC | 0.221 ± 0.017       | 0.228 ± 0.017          | -2.14    | 0.037          | -0.412         |
| R caudate–DLPFC | 0.227 ± 0.023       | 0.232 ± 0.020          | -1.52    | 0.14           | -0.232         |
| L caudate–OFC   | 0.213 ± 0.012       | 0.217 ± 0.011          | -2.08    | 0.043          | -0.347         |
| R caudate–OFC   | 0.212 ± 0.016       | 0.216 ± 0.015          | -1.47    | 0.15           | -0.258         |
| L SLF           | 0.198 ± 0.024       | 0.206 ± 0.023          | -2.21    | 0.032          | -0.340         |
| R SLF           | 0.223 ± 0.025       | 0.231 ± 0.022          | -2.14    | 0.038          | -0.340         |
| L cingulum      | 0.302 ± 0.028       | 0.308 ± 0.024          | -1.37    | 0.18           | -0.230         |
| R cingulum      | 0.279 ± 0.029       | 0.288 ± 0.020          | -2.32    | 0.025          | -0.361         |

ADHD = attention-deficit/hyperactivity disorder; DLPFC = dorsolateral prefrontal cortex; L = left; OFC = orbitofrontal cortex; R = right; SD = standard deviation; SLF = superior longitudinal fasciculus; VLPFC = ventrolateral prefrontal cortex.

**Table S2: Correlations between fibre tract microstructural property and ADHD symptoms in youths with ADHD (*n* = 50)**

| Fibre tract   | Symptom, correlation ( <i>p</i> value) |                  |                           |               |
|---------------|----------------------------------------|------------------|---------------------------|---------------|
|               | Inattention                            |                  | Hyperactivity/impulsivity |               |
|               | Left                                   | Right            | Left                      | Right         |
| Caudate–VLPFC | -0.268 (0.06)                          | -0.285 (0.044)   | -0.122 (0.40)             | -0.092 (0.52) |
| Caudate–DLPFC | -0.287 (0.043)                         | -0.298 (0.036)   | -0.013 (0.93)             | 0.025 (0.86)  |
| Caudate–OFC   | -0.262 (0.07)                          | -0.255 (0.08)    | -0.085 (0.56)             | -0.019 (0.89) |
| SLF           | -0.410 (0.003)                         | -0.483 (< 0.001) | 0.204 (0.16)              | 0.092 (0.53)  |
| Cingulum      | -0.434 (0.002)                         | -0.417 (0.003)   | 0.037 (0.80)              | 0.088 (0.55)  |

ADHD = attention-deficit/hyperactivity disorder; DLPFC = dorsolateral prefrontal cortex; OFC = orbitofrontal cortex; SLF = superior longitudinal fasciculus; VLPFC = ventrolateral prefrontal cortex.

**Appendix 1** to Chiang H-Y, Chen Y-J, Lo Y-C, et al. Altered white matter tract property related to impaired focused attention, sustained attention, cognitive impulsivity and vigilance in attention-deficit hyperactivity disorder

*J Psychiatry Neurosci* 2015.

DOI: 10.1503/jpn.140106

**Table S3: Comparison of the generalized fractional anisotropy values of 10 fibre tracts between right-handed youths with ADHD and healthy controls**

| Target tracts   | Group, mean ± SD    |                        | <i>t</i> | <i>p</i> value | Cohen <i>d</i> |
|-----------------|---------------------|------------------------|----------|----------------|----------------|
|                 | ADHD, <i>n</i> = 49 | Control, <i>n</i> = 49 |          |                |                |
| L caudate–VLPFC | 0.236 ± 0.016       | 0.242 ± 0.015          | -2.34    | 0.024          | -0.387         |
| R caudate–VLPFC | 0.235 ± 0.019       | 0.238 ± 0.017          | -1.24    | 0.22           | -0.166         |
| L caudate–DLPFC | 0.221 ± 0.017       | 0.227 ± 0.017          | -2.18    | 0.034          | -0.353         |
| R caudate–DLPFC | 0.227 ± 0.023       | 0.232 ± 0.019          | -1.38    | 0.18           | -0.237         |
| L caudate–OFC   | 0.213 ± 0.018       | 0.217 ± 0.011          | -1.97    | 0.06           | -0.268         |
| R caudate–OFC   | 0.212 ± 0.015       | 0.216 ± 0.015          | -1.55    | 0.13           | -0.267         |
| L SLF           | 0.197 ± 0.023       | 0.206 ± 0.022          | -2.71    | 0.009          | -0.400         |
| R SLF           | 0.223 ± 0.026       | 0.231 ± 0.021          | -2.53    | 0.015          | -0.339         |
| L cingulum      | 0.301 ± 0.028       | 0.307 ± 0.023          | -1.26    | 0.21           | -0.234         |
| R cingulum      | 0.278 ± 0.029       | 0.288 ± 0.019          | -2.38    | 0.022          | -0.408         |

ADHD = attention-deficit/hyperactivity disorder; DLPFC = dorsolateral prefrontal cortex; L = left; OFC = orbitofrontal cortex; R = right; SD = standard deviation; SLF = superior longitudinal fasciculus; VLPFC = ventrolateral prefrontal cortex.

**Table S4: Comparison of the generalized fractional anisotropy values of 10 fibre tracts between youths with ADHD and healthy controls, excluding the 10 medicated children with ADHD and their matched controls**

| Target tracts   | Group, mean ± SD    |                        | <i>t</i> | <i>p</i> value | Cohen <i>d</i> |
|-----------------|---------------------|------------------------|----------|----------------|----------------|
|                 | ADHD, <i>n</i> = 40 | Control, <i>n</i> = 40 |          |                |                |
| L caudate–VLPFC | 0.234 ± 0.016       | 0.242 ± 0.015          | -2.67    | 0.011          | -0.516         |
| R caudate–VLPFC | 0.232 ± 0.018       | 0.239 ± 0.017          | -2.25    | 0.030          | -0.400         |
| L caudate–DLPFC | 0.220 ± 0.017       | 0.228 ± 0.016          | -2.45    | 0.019          | -0.485         |
| R caudate–DLPFC | 0.224 ± 0.022       | 0.233 ± 0.019          | -2.19    | 0.034          | -0.438         |
| L caudate–OFC   | 0.212 ± 0.011       | 0.217 ± 0.010          | -2.30    | 0.027          | -0.476         |
| R caudate–OFC   | 0.210 ± 0.015       | 0.217 ± 0.015          | -2.41    | 0.021          | -0.467         |
| L SLF           | 0.193 ± 0.020       | 0.203 ± 0.021          | -3.10    | 0.004          | -0.488         |
| R SLF           | 0.220 ± 0.024       | 0.229 ± 0.021          | -2.48    | 0.017          | -0.399         |
| L cingulum      | 0.300 ± 0.025       | 0.304 ± 0.024          | -1.01    | 0.32           | -0.163         |
| R cingulum      | 0.276 ± 0.026       | 0.285 ± 0.019          | -2.01    | 0.05           | -0.395         |

ADHD = attention-deficit/hyperactivity disorder; DLPFC = dorsolateral prefrontal cortex; L = left; OFC = orbitofrontal cortex; R = right; SD = standard deviation; SLF = superior longitudinal fasciculus; VLPFC = ventrolateral prefrontal cortex.

**Appendix 1** to Chiang H-Y, Chen Y-J, Lo Y-C, et al. Altered white matter tract property related to impaired focused attention, sustained attention, cognitive impulsivity and vigilance in attention-deficit hyperactivity disorder

*J Psychiatry Neurosci* 2015.

DOI: 10.1503/jpn.140106

**Table S5: Final model of significant correlates from white matter fibre tracts for the attention dimensions as assessed using the CCPT in medication-naïve children with ADHD**

| Fibre tract           | CCPT dimension, $\beta$ ( $p$ value) |                              |                              |                              |                              |                                    |                              |                              |                              |          |                              |                             |
|-----------------------|--------------------------------------|------------------------------|------------------------------|------------------------------|------------------------------|------------------------------------|------------------------------|------------------------------|------------------------------|----------|------------------------------|-----------------------------|
|                       | Focused attention                    |                              |                              | Impulsivity                  |                              |                                    |                              |                              | Sustained attention          |          | Vigilance                    |                             |
|                       | Omission                             | RT SE                        | Variability                  | Detectability                | Commission                   | RT                                 | Response style               | Perseveration                | RT BC                        | RT SE BC | RT ISI BC                    | RT SE ISI BC                |
| L caudate–DLPFC       | 313.16<br>(0.08)                     | —                            | –474.35<br>(0.013)           | 10.20<br>(0.001)             | –233.02<br>( $< 0.001$ )     | —                                  | —                            | —                            | –1.17<br>(0.001)             | —        | —                            | —                           |
| L caudate–OFC         | —                                    | —                            | —                            | —                            | —                            | —                                  | —                            | —                            | —                            | —        | —                            | –6.28<br>(0.023)            |
| R caudate–OFC         | –781.28<br>(0.003)                   | –197.55<br>(0.025)           | —                            | —                            | —                            | —                                  | –7.87<br>(0.042)             | –434.95<br>(0.06)            | —                            | —        | —                            | —                           |
| L SLF                 | 377.24<br>(0.010)                    | 242.89<br>(0.034)            | 581.78<br>(0.07)             | –6.13<br>(0.020)             | 132.82<br>(0.018)            | 3078.36<br>(0.021)                 | —                            | —                            | 1.12<br>(0.043)              | —        | 1.62<br>(0.011)              | 4.29<br>(0.06)              |
| R SLF                 | —                                    | –208.68<br>(0.029)           | –533.40<br>(0.044)           | —                            | —                            | –4072.62<br>( $< 0.001$ )          | —                            | —                            | –1.28<br>(0.010)             | —        | —                            | —                           |
| L cingulum            | —                                    | —                            | —                            | —                            | —                            | —                                  | —                            | —                            | 0.56<br>(0.07)               | —        | —                            | —                           |
| R cingulum            | –263.91<br>(0.023)                   | —                            | —                            | —                            | —                            | —                                  | —                            | —                            | —                            | —        | –1.51<br>(0.002)             | –4.27<br>(0.016)            |
| <i>F</i> ( $p$ value) | $F_{4,35} = 5.42$<br>(0.002)         | $F_{3,36} = 4.34$<br>(0.010) | $F_{3,36} = 3.65$<br>(0.021) | $F_{2,37} = 6.91$<br>(0.033) | $F_{2,37} = 7.68$<br>(0.002) | $F_{2,37} = 8.96$<br>( $< 0.001$ ) | $F_{1,38} = 4.44$<br>(0.001) | $F_{1,38} = 3.67$<br>(0.063) | $F_{4,45} = 4.17$<br>(0.007) | —        | $F_{2,37} = 5.42$<br>(0.009) | $F_{3,36} = 4.8$<br>(0.007) |
| $R^2$                 | 0.38                                 | 0.27                         | 0.23                         | 0.27                         | 0.29                         | 0.10                               | 0.27                         | 0.09                         | 0.32                         | —        | 0.23                         | 0.29                        |

ADHD = attention-deficit/hyperactivity disorder; BC = block change; DLPFC = dorsolateral prefrontal cortex; ISI = interstimulus interval; L = left; OFC = orbitofrontal cortex; R = right; RT = reaction time; SD = standard deviation; SE = standard error; SLF = superior longitudinal fasciculus.

**Appendix 1** to Chiang H-Y, Chen Y-J, Lo Y-C, et al. Altered white matter tract property related to impaired focused attention, sustained attention, cognitive impulsivity and vigilance in attention-deficit hyperactivity disorder

*J Psychiatry Neurosci* 2015.

DOI: 10.1503/jpn.140106

**Table S6: Comparison of the 3 ex-Gaussian parameters between the ADHD and control groups as a function of ISI conditions**

| Condition | Group, mean $\pm$ SD |                        | <i>t</i> | <i>p</i> value | Cohen <i>d</i> |
|-----------|----------------------|------------------------|----------|----------------|----------------|
|           | ADHD, <i>n</i> = 44  | Control, <i>n</i> = 47 |          |                |                |
| ISI = 1 s |                      |                        |          |                |                |
| $\mu$     | 232.61 $\pm$ 47.68   | 260.88 $\pm$ 50.89     | -2.72    | 0.010          | -0.572         |
| $\sigma$  | 49.10 $\pm$ 24.33    | 37.47 $\pm$ 16.39      | 2.79     | 0.008          | 0.561          |
| $\tau$    | 109.88 $\pm$ 42.26   | 79.48 $\pm$ 36.58      | 3.74     | < 0.001        | 0.767          |
| ISI = 2 s |                      |                        |          |                |                |
| $\mu$     | 260.24 $\pm$ 61.75   | 286.15 $\pm$ 47.56     | -2.25    | 0.030          | -0.470         |
| $\sigma$  | 50.18 $\pm$ 27.82    | 38.75 $\pm$ 13.84      | 2.61     | 0.013          | 0.520          |
| $\tau$    | 144.07 $\pm$ 75.10   | 84.44 $\pm$ 42.10      | 4.71     | < 0.001        | 0.978          |
| ISI = 4 s |                      |                        |          |                |                |
| $\mu$     | 297.59 $\pm$ 61.86   | 317.39 $\pm$ 61.26     | -1.53    | 0.13           | -0.322         |
| $\sigma$  | 54.07 $\pm$ 20.83    | 39.21 $\pm$ 18.80      | 4.06     | < 0.001        | 0.749          |
| $\tau$    | 180.77 $\pm$ 129.39  | 96.51 $\pm$ 47.32      | 4.24     | < 0.001        | 2.137          |

ADHD = attention-deficit/hyperactivity disorder; ISI = interstimulus interval; SD = standard deviation.

**Appendix 1** to Chiang H-Y, Chen Y-J, Lo Y-C, et al. Altered white matter tract property related to impaired focused attention, sustained attention, cognitive impulsivity and vigilance in attention-deficit hyperactivity disorder

*J Psychiatry Neurosci* 2015.

DOI: 10.1503/jpn.140106

| Table S7 : Final model of significant correlates from white matter fibre tracts for the attention dimensions as assessed using the CCPT |                           |                           |                           |                          |                          |                           |                           |                           |                           |
|-----------------------------------------------------------------------------------------------------------------------------------------|---------------------------|---------------------------|---------------------------|--------------------------|--------------------------|---------------------------|---------------------------|---------------------------|---------------------------|
| Fibre tract                                                                                                                             | ISI, $\beta$ ( $p$ value) |                           |                           |                          |                          |                           |                           |                           |                           |
|                                                                                                                                         | $\mu$                     |                           |                           | $\sigma$                 |                          |                           | $\tau$                    |                           |                           |
|                                                                                                                                         | ISI = 1 s                 | ISI = 2 s                 | ISI = 4 s                 | ISI = 1 s                | ISI = 2 s                | ISI = 4 s                 | ISI = 1 s                 | ISI = 2 s                 | ISI = 4 s                 |
| <b>Control</b>                                                                                                                          |                           |                           |                           |                          |                          |                           |                           |                           |                           |
| L caudate–VLPFC                                                                                                                         | —                         | -1533.80 (0.040)          | -1803.73 (0.046)          | —                        | —                        | -611.42 (0.07)            | -676.32 (0.09)            | -687.43 (0.09)            | —                         |
| R caudate–VLPFC                                                                                                                         | —                         | 1528.15 (0.06)            | —                         | —                        | —                        | —                         | —                         | —                         | —                         |
| L caudate–DLPFC                                                                                                                         | 1451.41 (0.038)           | 2199.97 (0.003)           | 2082.73 (0.012)           | —                        | —                        | —                         | —                         | —                         | —                         |
| R caudate–DLPFC                                                                                                                         | -1378.26 (0.031)          | -1794.95 (0.017)          | —                         | —                        | —                        | —                         | —                         | —                         | —                         |
| L caudate–OFC                                                                                                                           | —                         | —                         | —                         | —                        | —                        | 1700.06 (0.002)           | —                         | —                         | —                         |
| R caudate–OFC                                                                                                                           | —                         | —                         | —                         | —                        | —                        | -852.50 (0.011)           | —                         | —                         | -1544.17 (0.006)          |
| L SLF                                                                                                                                   | —                         | —                         | —                         | —                        | —                        | —                         | 689.74 (0.22)             | —                         | 603.39 (0.08)             |
| R SLF                                                                                                                                   | —                         | —                         | —                         | —                        | —                        | 268.32 (0.09)             | —                         | —                         | —                         |
| L cingulum                                                                                                                              | —                         | —                         | —                         | —                        | —                        | —                         | -499.92 (0.10)            | —                         | —                         |
| <i>F</i> ( $p$ value)                                                                                                                   | $F_{2,43} = 2.73$ (0.08)  | $F_{4,42} = 3.13$ (0.024) | $F_{2,44} = 3.44$ (0.041) | —                        | —                        | $F_{4,42} = 3.3$ (0.020)  | $F_{3,42} = 3.03$ (0.040) | $F_{1,45} = 2.96$ (0.09)  | $F_{2,44} = 4.15$ (0.022) |
| $R^2$                                                                                                                                   | 0.11                      | 0.23                      | 0.14                      | —                        | —                        | 0.24                      | 0.18                      | 0.06                      | 0.16                      |
| <b>ADHD</b>                                                                                                                             |                           |                           |                           |                          |                          |                           |                           |                           |                           |
| L caudate–VLPFC                                                                                                                         | —                         | -1967.44 (0.035)          | -1688.61 (0.056)          | -899.46 (0.032)          | —                        | —                         | —                         | —                         | —                         |
| R caudate–VLPFC                                                                                                                         | —                         | —                         | —                         | 769.32 (0.049)           | —                        | —                         | —                         | —                         | —                         |
| L caudate–DLPFC                                                                                                                         | 963.18 (0.027)            | 2450.02 (0.006)           | 2851.26 (0.001)           | —                        | 511.69 (0.07)            | —                         | —                         | —                         | —                         |
| L caudate–OFC                                                                                                                           | —                         | —                         | —                         | 1582.3 (0.018)           | —                        | 710.10 (0.027)            | —                         | —                         | —                         |
| R caudate–OFC                                                                                                                           | —                         | —                         | —                         | -1084.54                 | —                        | —                         | —                         | -2183.65 (0.005)          | -2785.14 (0.044)          |
| R SLF                                                                                                                                   | -751.99 (0.010)           | —                         | —                         | —                        | —                        | -349.30 (0.010)           | —                         | —                         | —                         |
| L cingulum                                                                                                                              | —                         | —                         | —                         | —                        | -398.67 (0.021)          | —                         | —                         | —                         | —                         |
| <i>F</i> ( $p$ value)                                                                                                                   | $F_{2,41} = 5.04$ (0.011) | $F_{2,41} = 4.22$ (0.022) | $F_{2,41} = 7.11$ (0.002) | $F_{4,39} = 2.51$ (0.06) | $F_{2,41} = 3.19$ (0.05) | $F_{2,41} = 4.56$ (0.016) | —                         | $F_{1,42} = 8.59$ (0.005) | $F_{1,42} = 4.31$ (0.044) |
| $R^2$                                                                                                                                   | 0.20                      | 0.17                      | 0.26                      | 0.20                     | 0.13                     | 0.18                      | —                         | 0.17                      | 0.09                      |

ADHD = attention-deficit/hyperactivity disorder; DLPFC = dorsolateral prefrontal cortex; ISI = interstimulus interval; L = left; OFC = orbitofrontal cortex; R = right; SLF = superior longitudinal fasciculus.

**Appendix 1** to Chiang H-Y, Chen Y-J, Lo Y-C, et al. Altered white matter tract property related to impaired focused attention, sustained attention, cognitive impulsivity and vigilance in attention-deficit hyperactivity disorder

*J Psychiatry Neurosci* 2015.

DOI: 10.1503/jpn.140106

| Table S8: Interactions between attention dimensions and mean generalized fractional anisotropy values of fibre tracts (part 1 of 2) |                 |          |                |
|-------------------------------------------------------------------------------------------------------------------------------------|-----------------|----------|----------------|
| Dimension                                                                                                                           | Fibre tract     | <i>t</i> | <i>p</i> value |
| Omission                                                                                                                            | L caudate–VLPFC | -1.71    | 0.09           |
|                                                                                                                                     | L caudate–OFC   | -2.19    | 0.031          |
|                                                                                                                                     | R caudate–OFC   | -2.72    | 0.008          |
| RE SE                                                                                                                               | R caudate–OFC   | -2.02    | 0.046          |
| Variability                                                                                                                         | L caudate–DLPFC | -1.67    | 0.09           |
| Detectability                                                                                                                       | L caudate–DLPFC | 2.53     | 0.013          |
|                                                                                                                                     | R caudate–OFC   | 1.97     | 0.05           |
|                                                                                                                                     | L caudate–VLPFC | -2.39    | 0.019          |
| Commission                                                                                                                          | L caudate–DLPFC | -2.08    | 0.040          |
|                                                                                                                                     | R SLF           | -1.01    | 0.32           |
|                                                                                                                                     | R caudate–DLPFC | -0.34    | 0.73           |
| RT                                                                                                                                  | L caudate–OFC   | 0.2      | 0.84           |
|                                                                                                                                     | L cingulum      | -0.68    | 0.50           |
|                                                                                                                                     | L caudate–DLPFC | -0.65    | 0.52           |
| Response style                                                                                                                      | R caudate–DLPFC | -1.33    | 0.19           |
|                                                                                                                                     | L caudate–OFC   | 0.43     | 0.67           |
|                                                                                                                                     | R caudate–OFC   | -0.67    | 0.50           |
| Perseveration                                                                                                                       | R cingulum      | 0.91     | 0.37           |
|                                                                                                                                     | R caudate–VLPFC | -0.96    | 0.34           |
|                                                                                                                                     | L caudate–DLPFC | -1.12    | 0.27           |
| RT BC                                                                                                                               | R caudate–DLPFC | -0.55    | 0.58           |
|                                                                                                                                     | L caudate–OFC   | -1.5     | 0.14           |
|                                                                                                                                     | R SLF           | -0.93    | 0.36           |
| RT SE BC                                                                                                                            | R cingulum      | -0.5     | 0.62           |
|                                                                                                                                     | L caudate–VLPFC | -3.14    | 0.002          |
|                                                                                                                                     | L caudate–DLPFC | -2.83    | 0.006          |
| RT BC                                                                                                                               | R caudate–DLPFC | -2.71    | 0.008          |
|                                                                                                                                     | L caudate–OFC   | -2.26    | 0.026          |
|                                                                                                                                     | R SLF           | -1.65    | 0.10           |
| RT SE BC                                                                                                                            | R cingulum      | -1.1     | 0.27           |
|                                                                                                                                     | R caudate–DLPFC | -1.74    | 0.09           |
|                                                                                                                                     | L cingulum      | 0.39     | 0.70           |
|                                                                                                                                     | R cingulum      | 0.6      | 0.55           |

**Appendix 1** to Chiang H-Y, Chen Y-J, Lo Y-C, et al. Altered white matter tract property related to impaired focused attention, sustained attention, cognitive impulsivity and vigilance in attention-deficit hyperactivity disorder

*J Psychiatry Neurosci* 2015.

DOI: 10.1503/jpn.140106

**Table S8: Interactions between attention dimensions and mean generalized fractional anisotropy values of fibre tracts (part 2 of 2)**

| Dimension    | Fibre tract     | <i>t</i> | <i>p</i> value |
|--------------|-----------------|----------|----------------|
| RT ISI BC    | L cingulum      | -2.3     | 0.024          |
| RT SE ISI BC | L caudate-DLPFC | -1.29    | 0.20           |
|              | R cingulum      | -1.72    | 0.09           |

ADHD = attention-deficit/hyperactivity disorder; BC = block change; DLPFC = dorsolateral prefrontal cortex; ISI = interstimulus interval; L = left; OFC = orbitofrontal cortex; R = right; RT = reaction time; SD = standard deviation; SE = standard error; SLF = superior longitudinal fasciculus.
